# Supplementary material
Source: PubMed Central journal article supplement (PMC10231520)
Supplement: ebmental-2022-300493supp001.pdf [file ebmental-2022-300493supp001.pdf]

**eTable 1. Incident rate ratios (IRR) with 95% confidence intervals (95% CI) derived from within-individual analysis for the association between specific antipsychotic medication and violent crime among male and suicidal behavior both among men and women diagnosed with personality disorders.**

|                      | Violent crime |      |            | Suicidal behavior |      |            |
|----------------------|---------------|------|------------|-------------------|------|------------|
|                      | Cases         | IRR  | 95% CI     | Cases             | IRR  | 95% CI     |
| Risperidone          |               |      |            |                   |      |            |
| No medication (ref)  | 235           | 1.00 |            | 1315              | 1.00 |            |
| Medication           | 77            | 0.55 | 0.36, 0.84 | 599               | 0.66 | 0.56, 0.77 |
| Olanzapine           |               |      |            |                   |      |            |
| No medication (ref)  | 365           | 1.00 |            | 1528              | 1.00 |            |
| Medication           | 82            | 0.51 | 0.36, 0.72 | 764               | 0.67 | 0.59, 0.77 |
| Quetiapine           |               |      |            |                   |      |            |
| No medication (ref)  | 1419          | 1.00 |            | 9156              | 1.00 |            |
| Medication           | 156           | 0.50 | 0.41, 0.62 | 1710              | 0.55 | 0.51, 0.59 |
| Clozapine            |               |      |            |                   |      |            |
| No medication (ref)  | 16            | -    |            | 38                | 1.00 |            |
| Medication           | 15            | -    | -          | 66                | 0.57 | 0.31, 1.08 |
| Other antipsychotics |               |      |            |                   |      |            |
| No medication (ref)  | 1330          | 1.00 |            | 9876              | 1.00 |            |
| Medication           | 307           | 0.54 | 0.45, 0.64 | 4420              | 0.65 | 0.62, 0.69 |

Models are adjusted for age and use of antidepressants and hypnotics/anxiolytics. Only patients without other prescribed antipsychotics than in question included in analyses. The analysis for the association between clozapine and violent crime was not feasible due to a low number of cases.

**eTable 2. Incident rate ratios (IRR) with 95% confidence intervals (95% CI) derived from within-individual analysis for the association between psychotropic medication and violent crime or suicidal behavior among individuals diagnosed with personality disorders.**

|                     | Men   |      |            | Women |      |            |
|---------------------|-------|------|------------|-------|------|------------|
|                     | Cases | IRR  | 95% CI     | Cases | IRR  | 95% CI     |
| Violent crime       |       |      |            |       |      |            |
| No medication (ref) | 184   | 1.00 |            | 58    | 1.00 |            |
| Medication          | 163   | 0.87 | 0.66, 1.16 | 86    | 0.78 | 0.49, 1.24 |
| Suicidal behavior   |       |      |            |       |      |            |
| No medication (ref) | 920   | 1.00 |            | 1,630 | 1.00 |            |
| Medication          | 1,066 | 0.86 | 0.76, 0.98 | 1,931 | 0.75 | 0.69, 0.83 |

Psychotropic medication refers to antipsychotics and lithium. Individuals in the analyses are those who have dispensed both antipsychotics and lithium. Models are adjusted for age and use of antidepressants and hypnotics/anxiolytics.

**eTable 3. Incident rate ratios (IRR) with 95% confidence intervals (95% CI) derived from within-individual analysis for the association between antipsychotic medication and violent crime or suicidal behavior among individuals diagnosed with specific personality disorders.**

|                         | Violent crime |      |            | Suicidal behavior |      |            |
|-------------------------|---------------|------|------------|-------------------|------|------------|
|                         | Cases         | IRR  | 95% CI     | Cases             | IRR  | 95% CI     |
| Paranoid pd             |               |      |            |                   |      |            |
| No medication (ref)     | 377           | 1.00 |            | 1602              | 1.00 |            |
| Medication              | 292           | 1.07 | 0.86, 1.33 | 1589              | 0.94 | 0.85, 1.05 |
| Schizoid pd             |               |      |            |                   |      |            |
| No medication (ref)     | 287           | 1.00 |            | 1715              | 1.00 |            |
| Medication              | 255           | 0.94 | 0.74, 1.20 | 1508              | 0.78 | 0.70, 0.86 |
| Dissocial pd            |               |      |            |                   |      |            |
| No medication (ref)     | 2053          | 1.00 |            | 4100              | 1.00 |            |
| Medication              | 758           | 0.58 | 0.52, 0.65 | 3224              | 0.90 | 0.85, 0.96 |
| Emotionally unstable pd |               |      |            |                   |      |            |
| No medication (ref)     | 3829          | 1.00 |            | 21570             | 1.00 |            |
| Medication              | 2077          | 0.77 | 0.72, 0.83 | 14543             | 0.82 | 0.80, 0.85 |
| Histrionic pd           |               |      |            |                   |      |            |
| No medication (ref)     | 178           | 1.00 |            | 985               | 1.00 |            |
| Medication              | 146           | 0.72 | 0.52, 0.99 | 1068              | 0.83 | 0.73, 0.95 |
| Anankastic pd           |               |      |            |                   |      |            |
| No medication (ref)     | 173           | 1.00 |            | 1115              | 1.00 |            |
| Medication              | 122           | 0.74 | 0.56, 1.01 | 887               | 0.97 | 0.85, 1.11 |
| Anxious pd              |               |      |            |                   |      |            |
| No medication (ref)     | 764           | 1.00 |            | 5766              | 1.00 |            |
| Medication              | 539           | 0.84 | 0.72, 0.98 | 4203              | 0.83 | 0.78, 0.88 |
| Dependent pd            |               |      |            |                   |      |            |
| No medication (ref)     | 303           | 1.00 |            | 2445              | 1.00 |            |
| Medication              | 313           | 1.11 | 0.89, 1.39 | 2461              | 0.96 | 0.88, 1.04 |
| Other specific pd       |               |      |            |                   |      |            |
| No medication (ref)     | 560           | 1.00 |            | 2676              | 1.00 |            |
| Medication              | 331           | 0.70 | 0.57, 0.85 | 2331              | 0.85 | 0.78, 0.92 |
| Pd, unspecified         |               |      |            |                   |      |            |
| No medication (ref)     | 3817          | 1.00 |            | 19137             | 1.00 |            |
| Medication              | 1885          | 0.72 | 0.67, 0.78 | 12089             | 0.81 | 0.78, 0.84 |
| Mixed and other pds     |               |      |            |                   |      |            |
| No medication (ref)     | 1428          | 1.00 |            | 7413              | 1.00 |            |
| Medication              | 816           | 0.84 | 0.75, 0.95 | 5352              | 0.85 | 0.81, 0.90 |

Sensitivity test: Within-individual associations between prescriptions of antipsychotic medications and violent crime and suicidal behavior where crimes or suicide attempts occurring between 7 to 30 days before the antipsychotic exposure were excluded. Models are adjusted for age and use of antidepressants and hypnotics/anxiolytics.
